# Supplementary material for: Skin Bacteria Mediate Glycerol Fermentation to Produce Electricity and Resist UV-B
Source: PubMed Central journal article supplement (PMC7409288; doi:10.3390/microorganisms8071092), 2020-07-21
Supplement: microorganisms-08-01092-s001.pdf [file microorganisms-08-01092-s001.pdf]

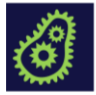

*Supplementary Materials*

# **Skin Bacteria Mediate Glycerol Fermentation to Produce Electricity and Resist to UV-B**

**Arun Balasubramaniam<sup>1</sup>, Prakoso Adi<sup>1</sup>, Do Thi Tra My<sup>1</sup>, Jen-Ho Yang<sup>1</sup>, Asy Syifa Labibah<sup>1</sup>, Chun-Ming Huang<sup>1,\*</sup>**

1. Department of Biomedical Sciences and Engineering, National Central University, Taoyuan 32001, Taiwan.

\* Correspondence: [chunming@ncu.edu.tw](mailto:chunming@ncu.edu.tw) (C.-M.H); Tel.: +886-3-422-7151 x 36104; Fax: +886-3-425-3427

Supplementary Table S1. 16S rRNA gene sequences of bacteria in fecal samples

| Colony Name | Nucleotide Sequence                                                                                                                                                                                                                                                                                                                                                                                                                                                                                                                                                            | Species            | % Identity |
|-------------|--------------------------------------------------------------------------------------------------------------------------------------------------------------------------------------------------------------------------------------------------------------------------------------------------------------------------------------------------------------------------------------------------------------------------------------------------------------------------------------------------------------------------------------------------------------------------------|--------------------|------------|
| F1          | GGGCGTGGCGCTGCTATACTGCAGTCGAACGCTTCTTCTCCCGAGTGC<br>TTGCACTCAATTGAAAAGAGGAGTGGCGGACGGGTGAGTAACACGTGGG<br>TAACCTACCCATCAGAGGGGGATAACAATTGGAAACAGGTGCTAATACC<br>GCATAACAGTTTATGCCGCATGGCATAAGAGTGAAAGGCGCTTTCGGGTG<br>TCGCTGATGGATGGACCCGCGGTGCATTAGCTAGTTGGTGAGGTAACGGC<br>TCACCAAGGCCACAATGCATAACCGACCTGAGAGGGTGATCGGCCACAC<br>TGGGACTGAGACACGGCCAGACTCCTACGGGAGGCAGCAGTAGGGAAT<br>CTTCGGCAATGGACGAAAGTCTGACCGAGCAACGCCGCGTGAGTGAAGA<br>AGGTTTTCGGATCGTAAAACCTCTGTTGTTAGAGAAGAACAAGGACGTTAG<br>TAACTGAACGTCCCCTGACGGTATCTAACCAGAAAGCCACGGCTAAACTA<br>CGTGCCAGCACCCGCGGGTAATAA  | <i>E. faecalis</i> | 98.82      |
| F2          | GTGCATGCGGGTGTATACATGCAGTCGAACGCTTCTTCTCCCGAGTGC<br>TTGCACTCAATTGAAAAGAGGAGTGGCGGACGGGTGAGTAACACGTGGG<br>TAACCTACCCATCAGAGGGGGATAACAATTGGAAACAGGTGCTAATACC<br>GCATAACAGTTTATGCCGCATGGCATAAGAGTGAAAGGCGCTTTCGGGTG<br>TCGCTGATGGATGGACCCGCGGTGCATTAGCTAGTTGGTGAGGTAACGGC<br>TCACCAAGGCCACGATGCATAGCCGACCTGAGAGGGTGATCGGCCACAC<br>TGGGACTGAGACACGGCCAGACTCCTACGGGAGGCAGCAGTAGGGAAT<br>CTTCGGCAATGGACGAAAGTCTGACCGAGCAACGCCGCGTGAGTGAAGA<br>AGGTTTTCGGATCGTAAAACCTCTGTTGTTAGAGAAGAACAAGGACGTTAG<br>TAACTGAACGTCCCCTGACGGTATCTAACCAGAAAGCCACGGCTAACTAC<br>GTGCCAGCAGCGGGCGGGTTATTA  | <i>E. faecalis</i> | 100.00     |
| F3          | GTGCAGTGC GCGGCTATACTGCAGTCGAACGCTTCTTCTCCCGAGTGC<br>TGCTCTCTATTGAAAAGAGGAGTGGTGGATGGGTGAGTAACACGTGGGTA<br>ACCTACCCATCAGAGGGGGATAACAATTGGAAACAGGTGCTAATACCGC<br>ATAACAGTTTATGCCGCATGGCATAAAAAGTGAAAGGCGCTTTCGGGTGTC<br>GCTGATGGATGGACCCGCGGTGCATTAGCTATTTGGTGAGGTAACGGCTC<br>ACCAAGGCCACAATGCATAACCGACCTGATAGGGTGATCGGCCACGCTG<br>GGACTGAAACACGGCCAGACTCCTACAGGAGGCAGCAGTAGGGAATCT<br>TCGGATGTGGACGAAAGTCTGACCGAGCAACGCCGCGTGAGTGAAGAAG<br>GTTTTCGGATCGTAAAACCTCTGTTGTTAGAGAAGAACAATGACGTTTGTAA<br>CTGAACGTCCCCTGACGGTATCTAACCTCAAAGCCACGGCCAACACTACGTG<br>CCAGCAGCCCCGTAATAAC | <i>E. faecalis</i> | 95.34      |

|           |                                                                                                                                                                                                                                                                                                                                                                                                                                                                                                                                                                                                                   |                   |              |
|-----------|-------------------------------------------------------------------------------------------------------------------------------------------------------------------------------------------------------------------------------------------------------------------------------------------------------------------------------------------------------------------------------------------------------------------------------------------------------------------------------------------------------------------------------------------------------------------------------------------------------------------|-------------------|--------------|
| <b>F4</b> | <p>GTGGCGTGC GGCTGCTATA CATGCAAGTCGAACGCTTTTTCTTTCACCGGA<br/> GCTTGCTCCACCGAAAGAAAAGGAGTGGCGAACGGGTGAGTAACACGTG<br/> GGTAACCTGCCCATCAGAAGGGGATAACACTTGAAACAGGTGCTAATA<br/> CCGTATAACAATCGAAACCGCATGGTTTTCGGTTTGAAAGGCGCTTTTGCCT<br/> CACTGATGGATGGACCCGCGGTGCATTAGCTAGTTGGTGAGGTAACGGCT<br/> CACCAAGGCAACGATGCATAGCCGACCTGAGAGGGTGATCGGCCACATT<br/> GGGACTGAGACACGGCCCAAACCTCCTACGGGAGGCAGCAGTAGGGAATC<br/> TTCGGCAATGGACGCAAGTCTGACCGAGCAACGCCGCGTGAGTGAAGAA<br/> GGTTTTCGGATCGTAAAACCTCTGTTGTTAGAGAAGAACAAGGATGAGAGT<br/> AAAATGTTTCATCCCTTGACGGTATCTAACCAGAAAGCCACGGCTAACTAC<br/> GTGCCAGCAGGGGCGGGTAATAAA</p> | <i>E. faecium</i> | <b>99.41</b> |
|-----------|-------------------------------------------------------------------------------------------------------------------------------------------------------------------------------------------------------------------------------------------------------------------------------------------------------------------------------------------------------------------------------------------------------------------------------------------------------------------------------------------------------------------------------------------------------------------------------------------------------------------|-------------------|--------------|

| Colony Name | Nucleotide Sequence                                                                                                                                                                                                                                                                                                                                                                                                                                                                                                                                                        | Species               | % Identity |
|-------------|----------------------------------------------------------------------------------------------------------------------------------------------------------------------------------------------------------------------------------------------------------------------------------------------------------------------------------------------------------------------------------------------------------------------------------------------------------------------------------------------------------------------------------------------------------------------------|-----------------------|------------|
| S1          | GGGGAATGGCGGGTGCTATACATGCAGTCGAGCGAACAGACG<br>AGGAGCTTGCTCCTCTGACGTTAGCGGCGGACGGGTGAGTAAC<br>ACGTGGATAACCTACCTATAAGACTGGGATAACTTCGGGAAAC<br>CGGAGCTAATACCGGATAATATATTGAACCGCATGGTTCAATA<br>GTGAAAGACGGTTTTGCTGTCACTTATAGATGGATCCGCGCCG<br>CATTAGCTAGTTGGTAAGGTAACGGCTTACCAAGGCAACGATG<br>CGTAGCCGACCTGAGAGGGTGATCGGCCACACTGGAAGTGAAG<br>ACACGGTCCAGACTCCTACGGGAGGCAGCAGTAGGGAATCTTC<br>CGCAATGGGCGAAAGCCTGACGGAGCAACGCCGCGTGAGTGA<br>TGAAGGTCTTCGGATCGTAAAACCTCTGTTATTAGGGAAGAACA<br>AATGTGTAAGTAACTATGCACGTCTTGACGGTACCTAATCAGA<br>AAGCCACGGCTAACTACGTGCCAGCAGCCGCGGTA    | <i>S. epidermidis</i> | 100.00     |
| S2          | CGGCCTGCGCTGCTATACATGCAAGTCGAGCGAACAGACGAG<br>GAGCTTGCTCCTCTGACGTTAGCGGCGGACGGGTGAGTAACAC<br>GTGGATAACCTACCTATAAGACTGGGATAACTTCGGGAAACCG<br>GAGCTAATACCGGATAATATATTGAACCGCATGGTTCAATAGT<br>GAAAGACGGTTTTGCTGTCACTTATAGATGGATCCGCGCCGCA<br>TTAGCTAGTTGGTAAGGTAACGGCTTACCAAGGCAACGATGCG<br>TAGCCGACCTGAGAGGGTGATCGGCCACACTGGAAGTGAAGAC<br>ACGGTCCAGACTCCTACGGGAGGCAGCAGTAGGGAATCTTCCG<br>CAATGGGCGAAAGCCTGACGGAGCAACGCCGCGTGAGTGATG<br>AAGGTCTTCGGATCGTAAAACCTCTGTTATTAGGGAAGAACAAA<br>TGTGTAAGTAACTATGCACGTCTTGACGGTACCTAATCAGAAA<br>GCCACGGCTAACTACGTGCCAGCAGCGGCGGTA      | <i>S. epidermidis</i> | 99.60      |
| S3          | CTGCAGTGCGGGTGCTATACATGCAGTCGAGCGAACAGACGA<br>GAAGCTTGCTCCTTCGACGTTAGCGGCGGACGGGTGAGTAACA<br>CGTGGGTAACCTACCTATAAGACTGGGATAACTTCGGGAAACC<br>GGGGCTAATACCGGATAATATTTGAAACCGCATGGTTTCGATAT<br>TGAAAGATGGCTTTGCTATCACTTATAGATGGACCTGCCCCGTA<br>TTAACTAGTTGGTAAGGTAACGGCTTACCAAGGCAACCATAACC<br>TAACCCAACTGAAAGGGTGATCGGCCACACTGGAAGTGAAGAC<br>ACGGTCCAGACTCCTACGGGAGGCAGCAGTAGGGAATCTTCCG<br>CAATGGGCGAAAGCCTGACGGAAACAACGCCGCGTGAGTGATG<br>AAGGTCTTCGGATCGTAAAACCTCTGTTATTAAGGAAGAACAAA<br>CGTGTAAGTAACTGTGCACGTCTTGACGGTACCTAATCAGAAA<br>GCCACGGCTAACTACGTGCCAACAGCCCCGGTAA | <i>S. hominis</i>     | 95.34      |

|    |                                                                                                                                                                                                                                                                                                                                                                                                                                                                                                                                                                                                                                                                                                                  |                  |       |
|----|------------------------------------------------------------------------------------------------------------------------------------------------------------------------------------------------------------------------------------------------------------------------------------------------------------------------------------------------------------------------------------------------------------------------------------------------------------------------------------------------------------------------------------------------------------------------------------------------------------------------------------------------------------------------------------------------------------------|------------------|-------|
| S4 | CCCTGTCGCTGTCGCGCAGACGCTCGATCTCCGTAACCAGCGT<br>CTCTTTCTCTTTCAGCAGCGCGCCAGCTTCTCGGCGTCGCCTG<br>ACTCCAGCAGCCGCGGTAATTTGCGGTTTCAGGGCGTCCAGCTG<br>ATCGCTCATACTGTTAATCTCGGCTTTTTCTTGCTCTTTCATGGC<br>GAAAACCTCGTTGTGGAAAACAGGCAAAGGATACACGAAAAGC<br>GGCACAGATTCGCGCGCGTCGATGGAGCGGGGCGCCTGAATCT<br>CAGGCGCCGGGACGTTTGAACGCCTGTTTCAGGCTGATGCGCG<br>AGATGAGTTCAGTCAGAGAGAGCACCATGGTCGAGCGCACCA<br>TCTGCAGATAGCGCTGTTGCTGCATGGCACGCAGCTCGGCGTC<br>ATCGGGATGAAAGTCCGGTTTTCGGCAGCCACGCAACCACACA<br>GTGCAGCTCGCCGAACGGGCCGAGTATCTCATCGTCAGTAAAA<br>CGGTAATCGCCCTGATCGTGATTCAGCTCTTCGCGCAGCGCCA<br>ACAGCAGCTCGCAATCTTCATACTCATGGCGGTTGATAACGCC<br>CAGACCGTAGATAAGCTTGAGGCGCACCGGCAGCTCGCCGAG<br>CGGACCATCGCCCAGCAGCCGGCGGTAAT | <i>P. vagans</i> | 78.52 |
|----|------------------------------------------------------------------------------------------------------------------------------------------------------------------------------------------------------------------------------------------------------------------------------------------------------------------------------------------------------------------------------------------------------------------------------------------------------------------------------------------------------------------------------------------------------------------------------------------------------------------------------------------------------------------------------------------------------------------|------------------|-------|

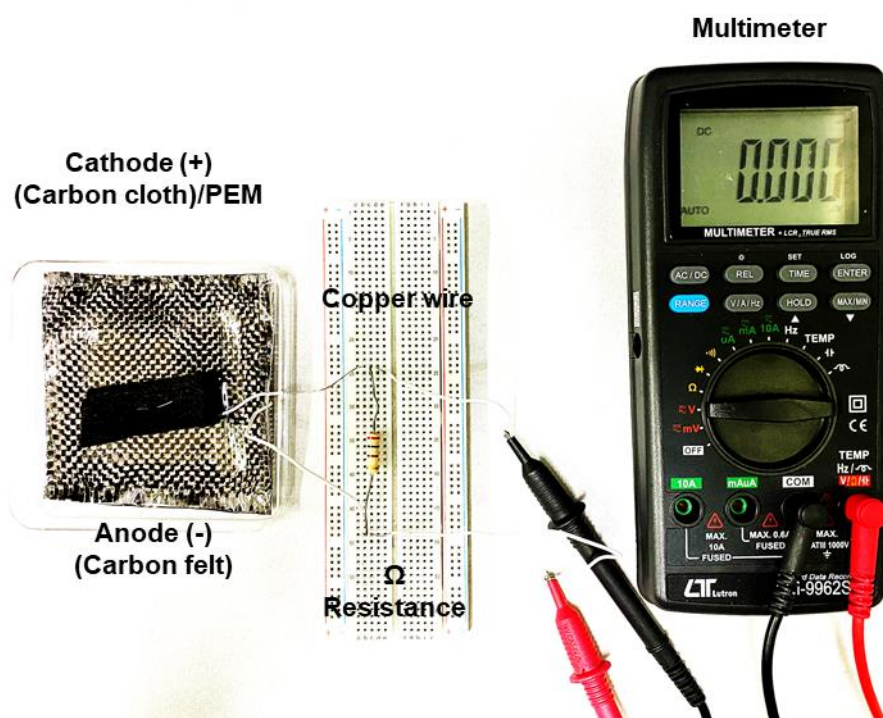

**Figure S1.** A photographic image of a lab-fabricated *in vitro* chamber for the detection of bacterial electricity. The components for fabrication of an *in vitro* chamber included an anode (carbon felt), a cathode (carbon cloth) which was wrapped with PEM. The carbon cloth/PEM was placed on a 10 diameter petri dish. Bacteria in media containing 2% glucose or glycerol were added on the surface of anode for electricity detection. Copper wire was used to connect anode and cathode to a 1,000  $\Omega$  resistor. The voltage change was read by a multimeter.

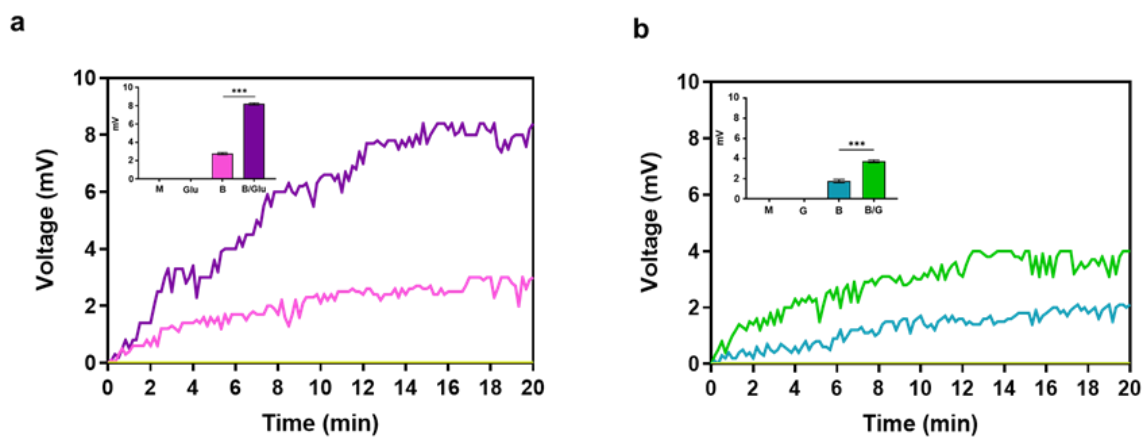

**Figure S2.** Electricity generation by *E. faecalis* and *S. hominis* in the presence of glucose or glycerol, respectively. (a) Media (M) or media containing glucose (Glu), *E. faecalis* (B), *E. faecalis* plus 2% glucose (B/Glu). (b) Media (M) or media containing glycerol (G), *S. hominis* (B), *S. hominis* plus 2% glycerol (B/G). Voltage changes (mV) in 20 min were measured. The inset panel represented the peak voltage of each group. Data are the mean  $\pm$  SD, in triplicate of three separate experiments. ns = non-significant. \*\*\* $P < 0.001$  (two-tailed t-tests).
